# Supplementary material for: A 1150-year-long AMV reconstruction suggests early warning for a North Atlantic climate tipping point
Source: Research Square preprint supplement (doi:10.21203/rs.3.rs-588180/v1), 2021-06-07
Supplement: Supplementary file 2 [file d800761807945091584f3414.docx]

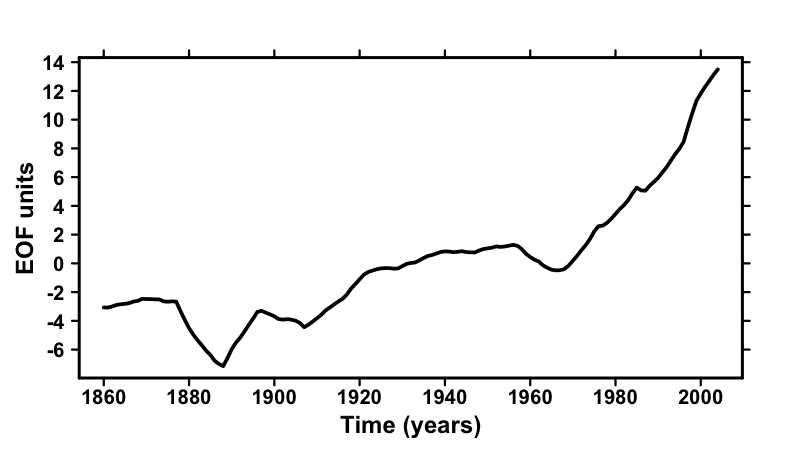


**Extended Data Fig. 1 |** Estimated forced component of historical NASST. Estimation is performed using signal-to-noise maximizing EOF2 (*cf*. Methods), using historical simulations from 37 climate models (Extended Data Table 2). The timeseries is filtered with 11-years running mean.
