# Supplementary material for: A 1150-year-long AMV reconstruction suggests early warning for a North Atlantic climate tipping point
Source: Research Square preprint supplement (doi:10.21203/rs.3.rs-588180/v1), 2021-06-07
Supplement: Supplementary file 5 [file 8b5abe96b6331dc61fbe1c5b.docx]

**
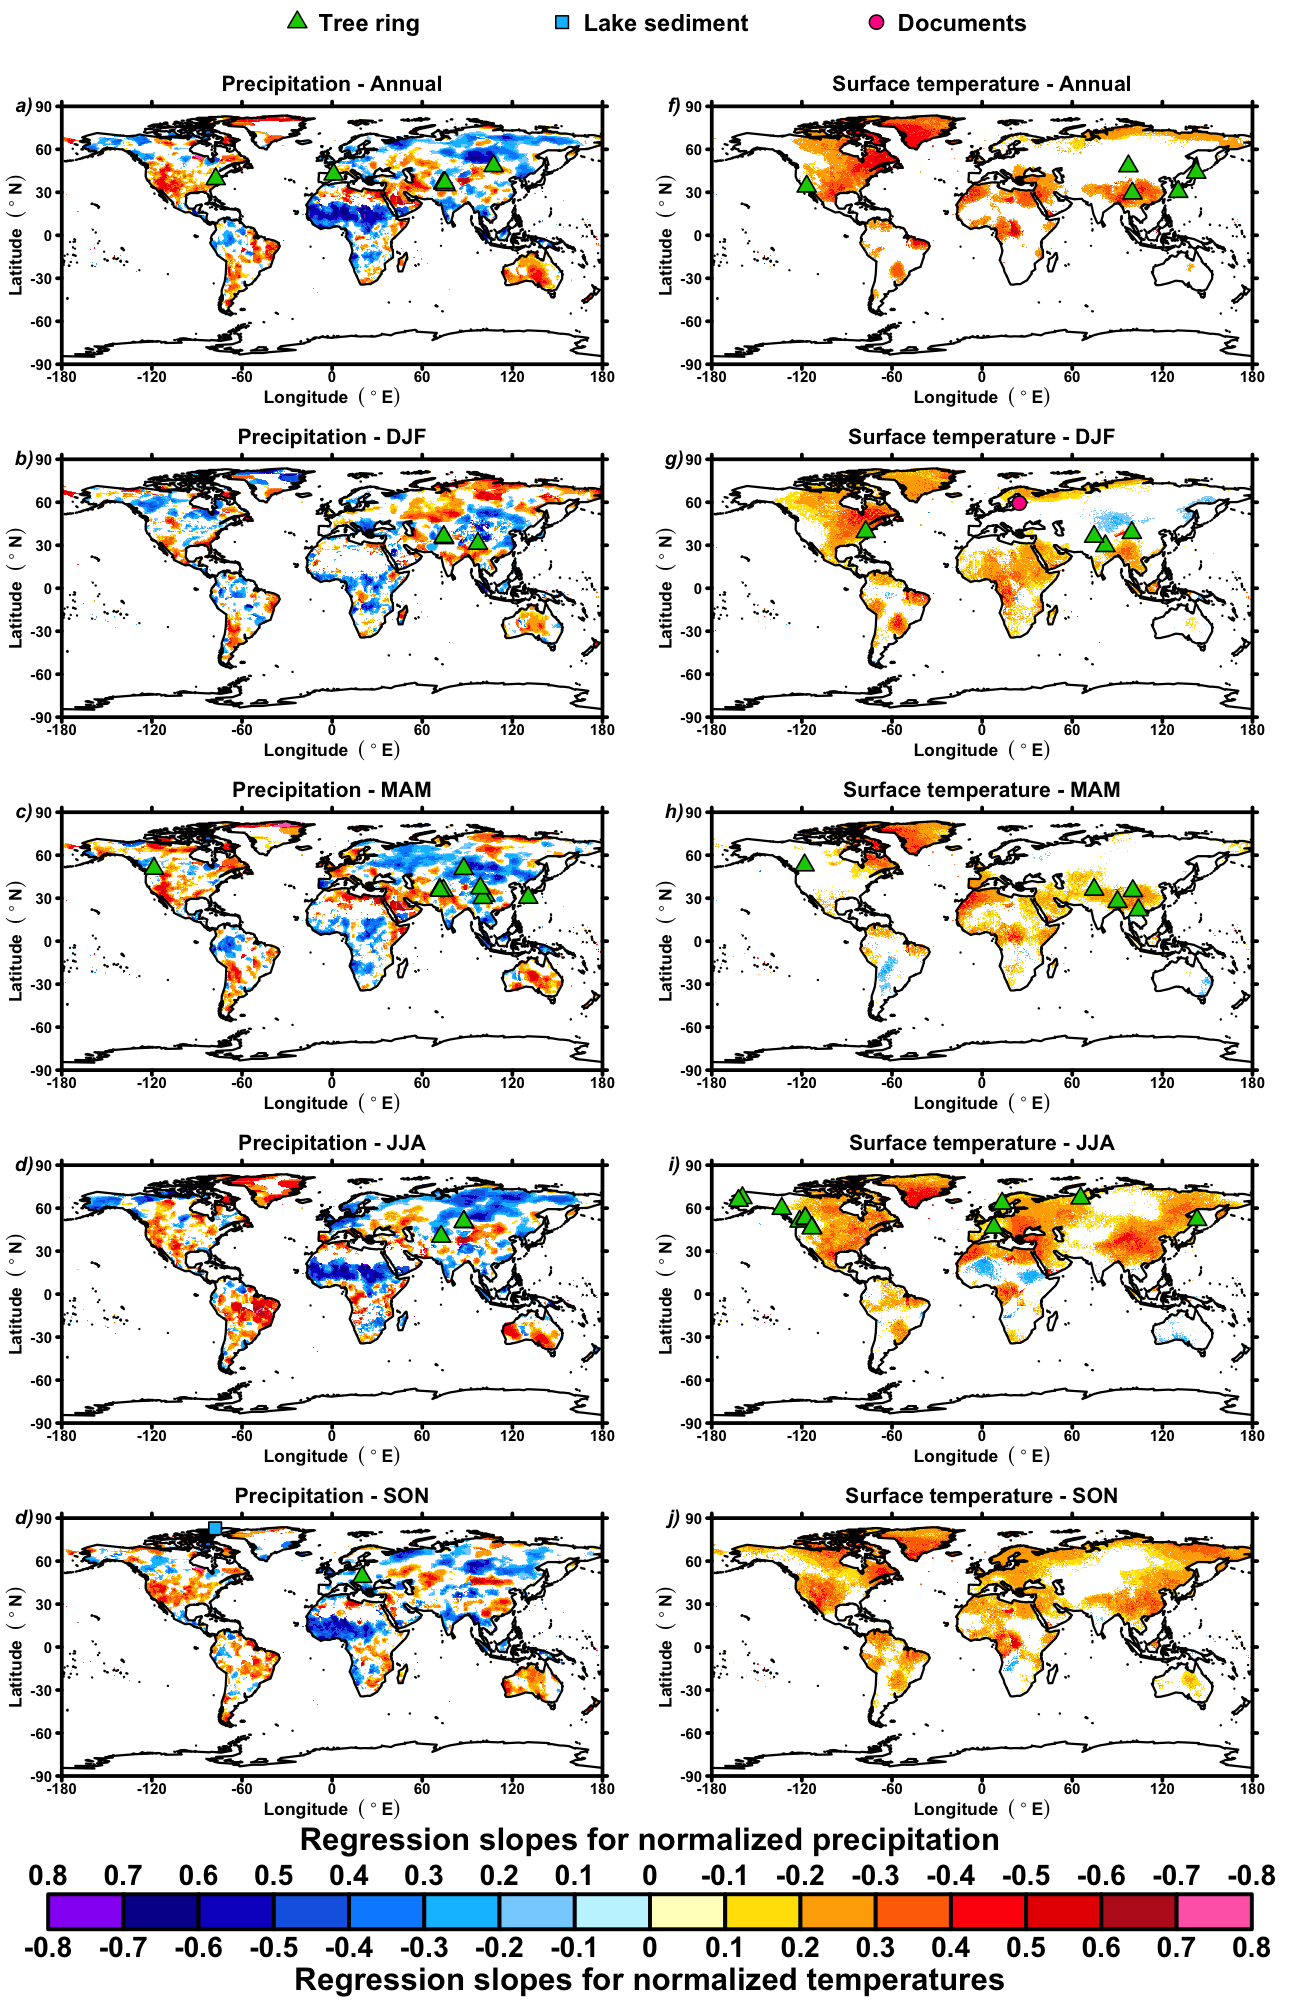
**

**Extended Data Fig. 3 | Location of proxy records and AMV climate fingerprint.** Same regression maps as Fig. 1 but with the location of the 54 (out of 55) terrestrial proxy records used for the reconstruction presented in this study.
