# Supplementary material for: A 1150-year-long AMV reconstruction suggests early warning for a North Atlantic climate tipping point
Source: Research Square preprint supplement (doi:10.21203/rs.3.rs-588180/v1), 2021-06-07
Supplement: Supplementary file 6 [file cb730564861f83cec0b99676.docx]

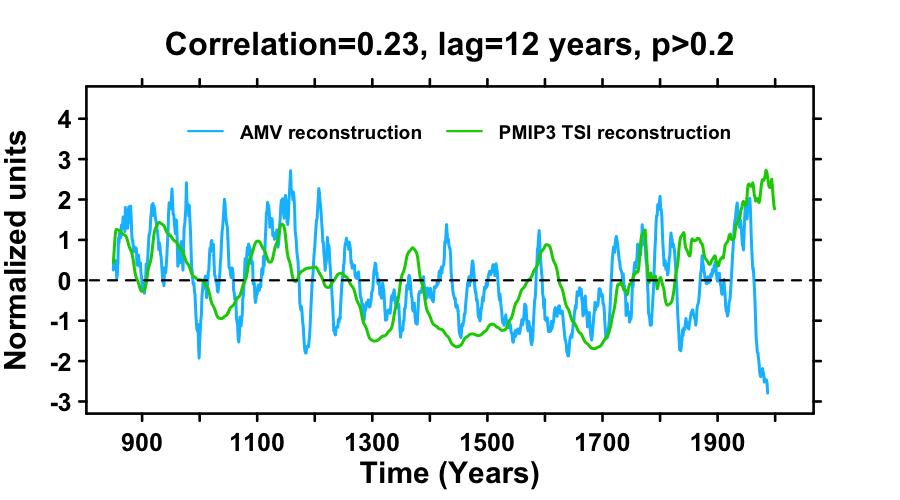


**Extended Data Fig. 5 | Comparison of the AMV reconstruction with the PMIP3 TSI reconstruction48.** Units have been normalized.
