# Supplementary material for: A 1150-year-long AMV reconstruction suggests early warning for a North Atlantic climate tipping point
Source: Research Square preprint supplement (doi:10.21203/rs.3.rs-588180/v1), 2021-06-07
Supplement: Supplementary file 8 [file e39e099efa860b5352b1f878.docx]

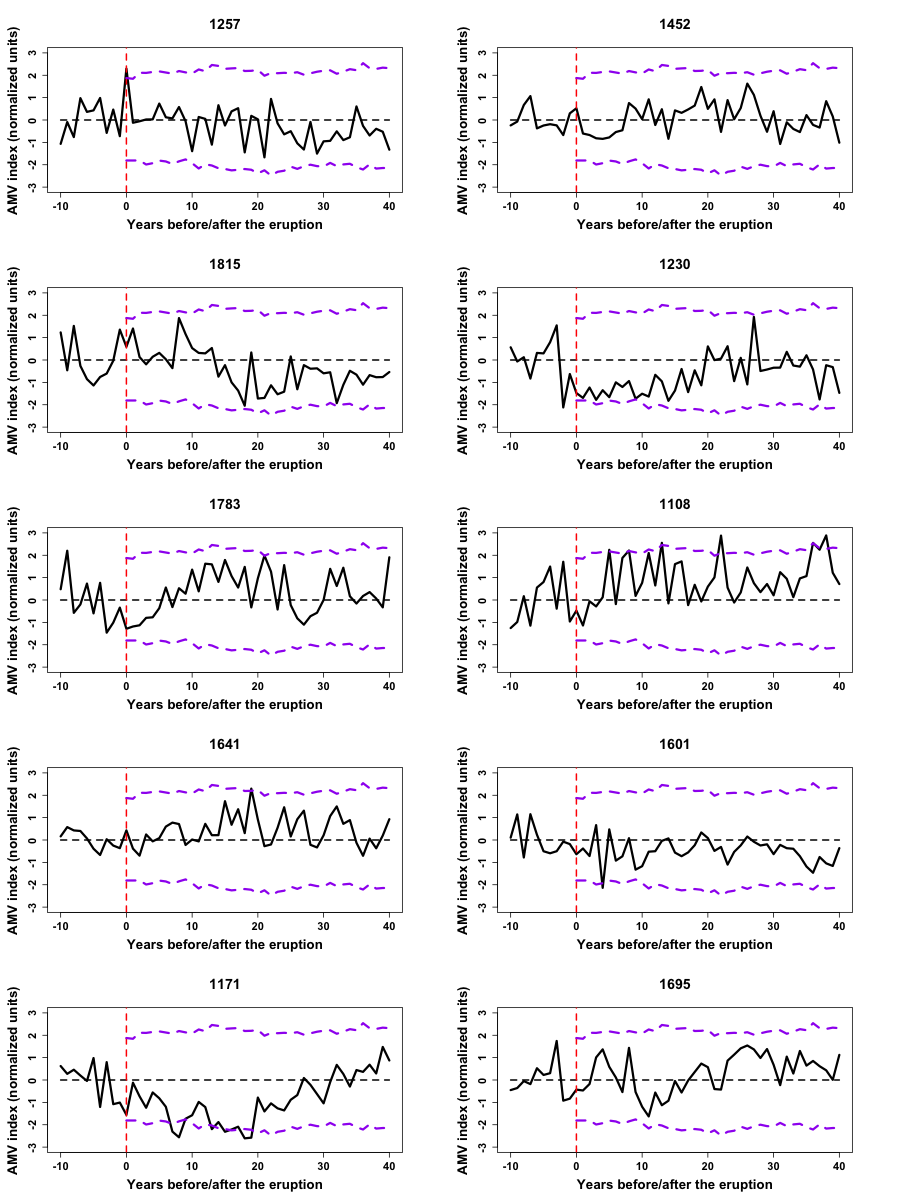


**Extended Data Fig. 4 | Individual AMV responses to the largest volcanic eruptions.** The year of the corresponding eruption is indicated above each panel. For each panel, the sub-timeseries of the AMV are centered to their average of the 10 years preceding the eruption. Two-tailed 95% confidence levels, calculated using a Monte-Carlo sampling47 of length 1000, are given by the dashed purple lines (see Methods).
