# Supplementary material for: A 1150-year-long AMV reconstruction suggests early warning for a North Atlantic climate tipping point
Source: Research Square preprint supplement (doi:10.21203/rs.3.rs-588180/v1), 2021-06-07
Supplement: Supplementary file 10 [file 46a44ed7fcf232adfc31281d.docx]

| **BCC-CSM1-1** | **GISS-E2-R** |
| --- | --- |
| **BCC-CSM1-1-M** | **HadCM3** |
| **BNU-ESM** | **HadGEM2-AO** |
| **CCSM4** | **HadGEM2-CC** |
| **CESM1-BGC** | **HadGEM2-ES** |
| **CESM1-CAM5-1-FV2** | **IPSL-CM5A-LR** |
| **CESM1-CAM5** | **IPSL-CM5A-MR** |
| **CNRM-CM5** | **IPSL-CM5B-LR** |
| **CSIRO-MK3-6-0** | **MIROC-ESM-CHEM** |
| **CanESM2** | **MIROC-ESM** |
| **EC-EARTH** | **MIROC5** |
| **FGOALS-s2** | **MPI-ESM-LR** |
| **FGOALS-g2** | **MPI-ESM-MR** |
| **FIO-ESM** | **MRI-CGCM3** |
| **GFDL-CM3** | **MRI-ESM1** |
| **GFDL-ESM2G** | **NorESM1-ME** |
| **GFDL-ESM2M** | **NorESM1-M** |
| **GISS-E2-H-CC** |  |
| **GISS-E2-H** |  |
| **GISS-E2-R-CC** |  |

**Extended Data Table 2 | List of the 37 CMIP5 models used for the estimation of the NASSTs forced component (Extended Data Fig. 1, Methods).**
