# Supplementary material for: A 1150-year-long AMV reconstruction suggests early warning for a North Atlantic climate tipping point
Source: Research Square preprint supplement (doi:10.21203/rs.3.rs-588180/v1), 2021-06-07
Supplement: Supplementary file 11 [file 7b8fd7d321a73c574c5f7340.docx]

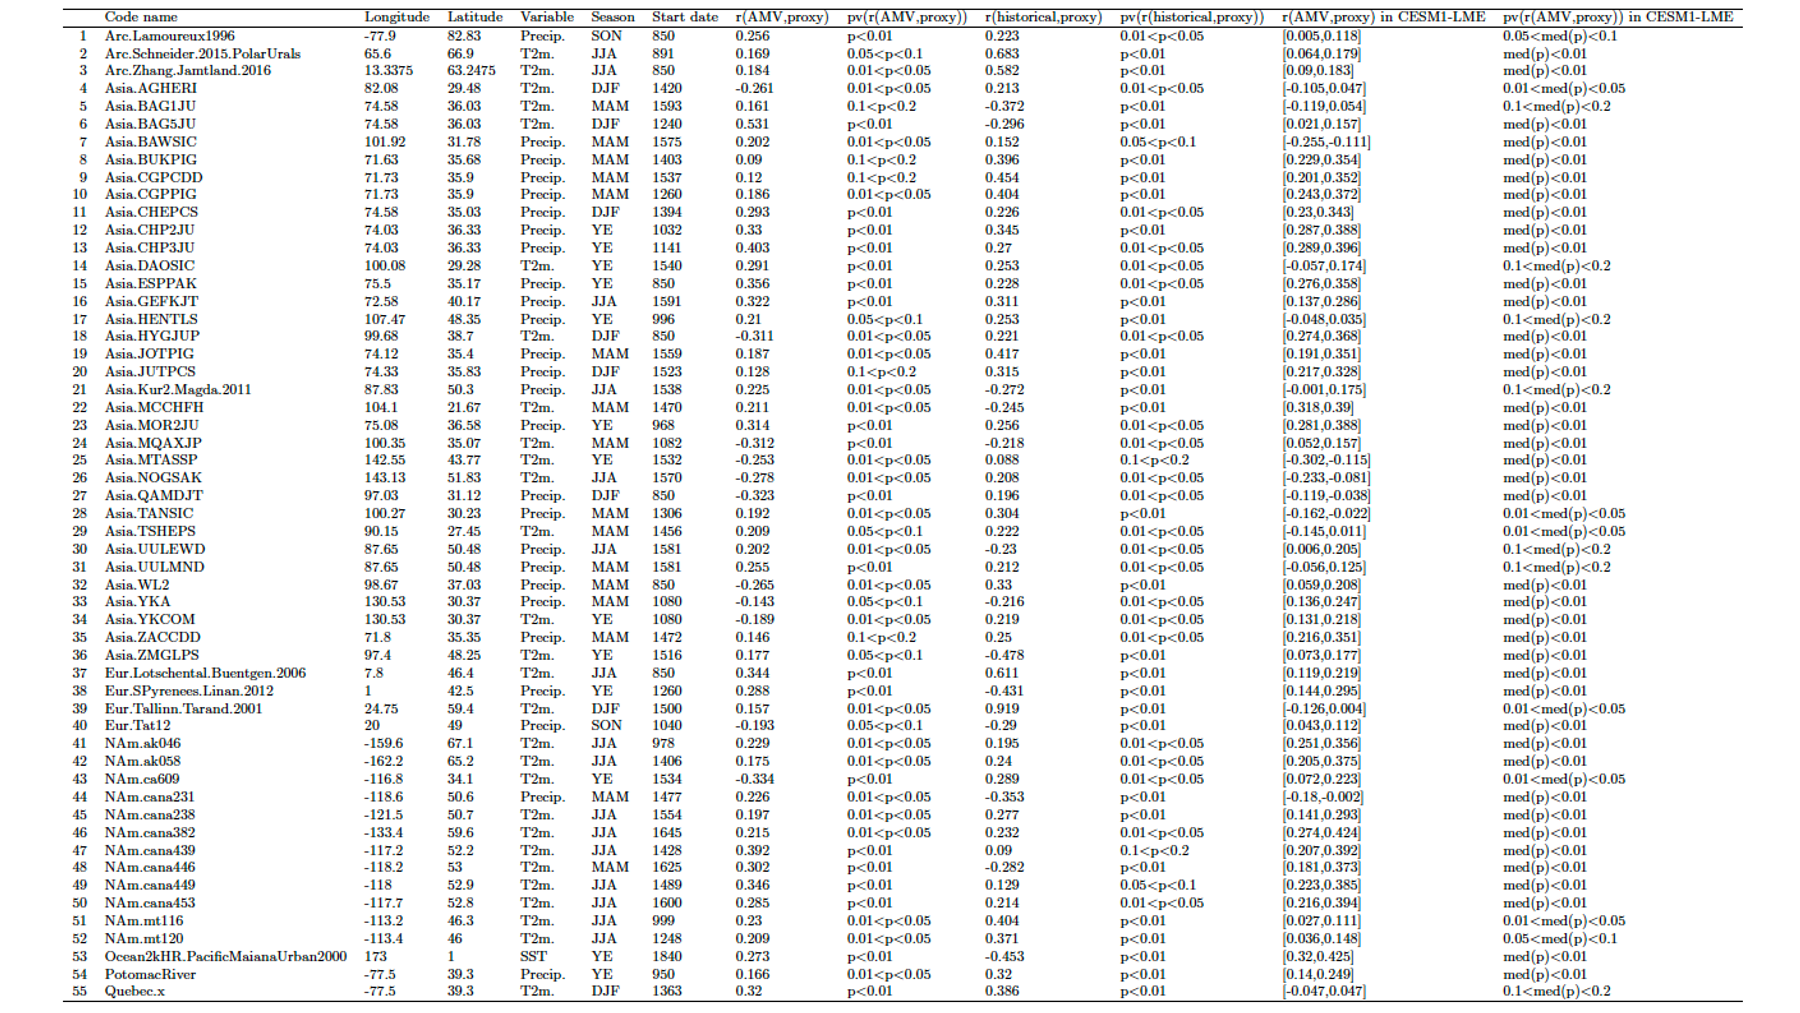


**Extended Data Table 3 | Characteristics of proxy records used for the final reconstruction presented in this study.** The correlation metric is denoted r, and the p-value of the correlation metric is denoted pv(r). Historical correlations and their significance have been calculated using the CRUTS4 dataset for the period 1901-2020. Correlations and their significance for the CESM1-LME experiment have been calculated for the period 850-1990, for the 12 members used in this study.
