# Supplementary material for: A 1150-year-long AMV reconstruction suggests early warning for a North Atlantic climate tipping point
Source: Research Square preprint supplement (doi:10.21203/rs.3.rs-588180/v1), 2021-06-07
Supplement: Supplementary file 12 [file 89991d707611dc2829418773.docx]

**
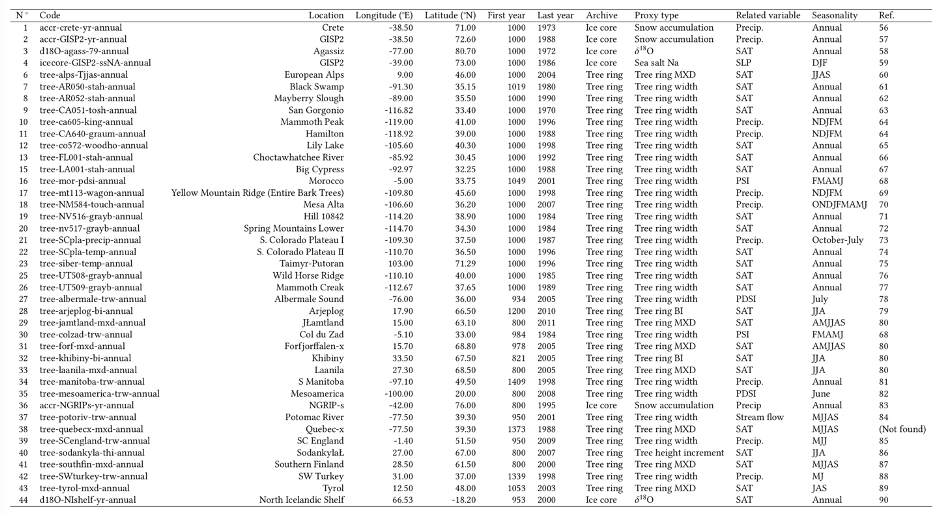
**

**Extended Data Table 1 | Proxy records added to the PAGES 2k database9 to build the P2k+ database (References in Supplementary information).**
