# Supplementary material for: A 1150-year-long AMV reconstruction suggests early warning for a North Atlantic climate tipping point
Source: Research Square preprint supplement (doi:10.21203/rs.3.rs-588180/v1), 2021-06-07
Supplement: Supplementary file 14 [file f1bea240c5b4e18984b83352.docx]

| **Volcano** | **Location** | **Year of the eruption** |
| --- | --- | --- |
| **Unknown** | **Unknown** | **1108** |
| **Unknown** | **Unknown** | **1171** |
| **Unknown** | **Unknown** | **1230** |
| **Samalas** | **Indonesia** | **1257** |
| **Kuwae** | **Vanuatu** | **1453** |
| **Huaynaputina** | **Peru** | **1601** |
| **Parker** | **Philippines** | **1641** |
| **Lakagigar** | **Iceland** | **1783** |
| **Tambora** | **Indonesia** | **1815** |

**Extended Data Table 4 | 10 last millennium largest volcanic eruptions.**
